# Supplementary material for: miRNA122a regulation of gene therapy vectors targeting hepatocellular cancer stem cells
Source: PubMed Central journal article supplement (PMC5955118; doi:10.18632/oncotarget.25280), 2018-05-04
Supplement: oncotarget-09-23577-s001.pdf [file oncotarget-09-23577-s001.pdf]

# miRNA122a regulation of gene therapy vectors targeting hepatocellular cancer stem cells

## SUPPLEMENTARY MATERIALS

### Supplementary Information

Sequence of the plasmid construct (pscCVM-GLuc-miR122a\*3)

Gluc coding region, flanking sequence with restriction sites (underlined), and miRNA122a binding sites (bold)

ATGGGAGTCAAAGTTCTGTTTGCCCTGATCTGCATCGCTGTGGCCGAGGCCAAGCCACCGAGAACAACG  
AAGACTTCAACATCGTGGCCGTGGCCAGCAACTTCGCGACCACGGATCTCGATGCTGACCGCGGGAGTTGCC  
GGCAAGAAGCTGCCGCTGGAGGTGCTCAAAGAGATGGAAGCCAATGCCCGAAAAGCTGGCTGCACCAGGGGG  
TCTGATCTGCCTGTCCCACATCAAGTGCACGCCAAGATGAAGAAGTTCATCCCAGACGCTGCCACACCTACGA  
AGCGACAAAGAGTCCGCACAGGGCGGCATAGGCGAGCGATCGTCGACATTCCTGAGATTCCTGGGTCAAGGA  
CTTGAGCCATGGAGCAGTCATCGCACAGGTTCGATCTGTGTGTGGACTGCACAACCTGGCTGCCTCAAAGGGCT  
TCCAACGTGCAGGTTCTGACCTGCTCAAGAAGTGGCTGCCGCAACGCTGTGCGACCTTGCCAGCAAGATCCAG  
GGCCAGGTGGACAAGATCAAGGGGGCCGGTGGTGGTAACTCGAGTAGCGCTAGGCCTACAAACACCAT  
TGTCACACTCCAACAAACACCATGTCACACTCCAACAAACACCATTGTCACACTCCA
